# Supplementary material
Source: publisher site journal article supplement (https://www.spandidos-publications.com/3640/downloadSupplementary)
Supplement: Supplementary file 1 [file downloadSupplementary]

Figure S1. Semi-quantification and statistical analysis results of all western blots. (A) Semi-quantified of western blot results of NCAPG expression in CRC cells transfected with shCtrl or shNCAPG. (B) Semi-quantified western blot results of the NCAPG-knockdown effect on apoptosis-related protein expression. (C) Semi-quantified western blot results of the relative expression of PI3K, p-PI3K, AKT and p-AKT in transfected and 740Y-P-treated CRC cells. (D) Semi-quantified western blot results of NCAPG expression in HCT15 cells transfected with miR-23b-3p mimic and HCT 116 treated with anti-miR-23b-3p. \* $P < 0.05$  and \*\* $P < 0.01$ . NCAPG, non-SMC condensing I complex subunit G; sh, short hairpin RNA; Ctrl, control; miR, microRNA; CRC, colorectal cancer; p-, phosphorylated.

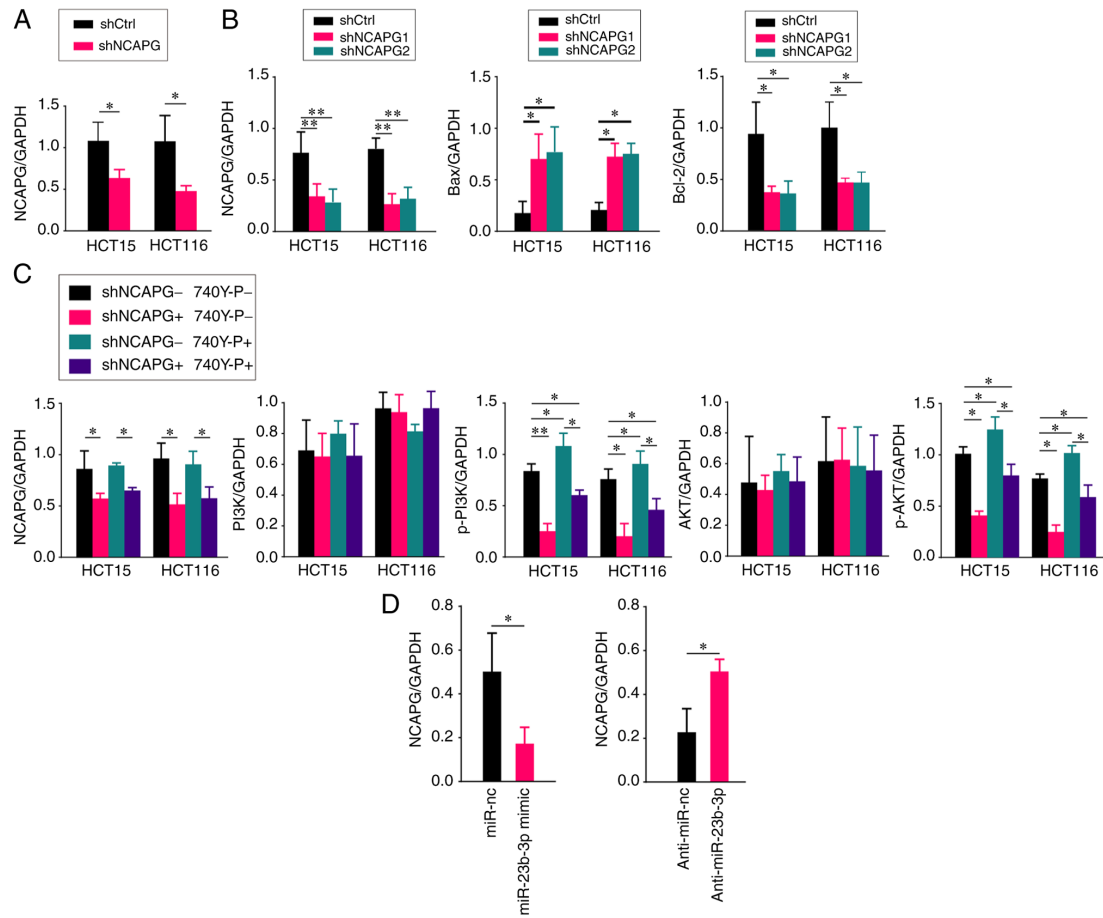



Figure S3. TargetScan, StarBase and miRcode databases were used to predict NCAPG as a potential downstream target of miR-23b-3p. miR, microRNA; NCAPG, non-SMC condensing I complex subunit G.

TargetScan

Position 746-752 of NCAPG 3' UTR    5' ... UUCUAGUGGGAAUAUAAUGUGAC...  
hsa-miR-23b-3p                         3'                         CCAUUAAGGGACCGUUACACUA

Starbase

Binding Site of hsa-miR-23b-3p on NCAPG:

Show 10 entries

Search: 

| BindingSite               | Class   | Alignment                                                                                                    | AgoExpNum | CleaveExpNum |
|---------------------------|---------|--------------------------------------------------------------------------------------------------------------|-----------|--------------|
| chr4:17845794-17845800[+] | 7mer-m8 | Target: 5' aaUAAUUCUAGUGGGAUAAUUGUGAc 3'<br>     :     :      <br>miRNA : 3' ccAUUAGGG--ACC-----GUUACACUa 5' | 8         | 0            |

MiRcode

| ENSG00000109805.5 (NCAPG) (coding) |               |           |                   |        |              |         |                   |
|------------------------------------|---------------|-----------|-------------------|--------|--------------|---------|-------------------|
| microRNA family                    | Seed position | Seed type | Transcript region | Repeat | Conservation |         |                   |
|                                    |               |           |                   |        | Primates     | Mammals | Other vertebrates |
| miR-23abc/23b-3p                   | chr4:17814700 | 7-mer-m8  | CDS.ncRNA         | no     | 89 %         | 43 %    | 46 %              |
| miR-23abc/23b-3p                   | chr4:17816593 | 7-mer-A1  | CDS               | no     | 89 %         | 74 %    | 38 %              |
| miR-23abc/23b-3p                   | chr4:17845801 | 7-mer-m8  | 3pUTR             | no     | 56 %         | 30 %    | 0 %               |

Table SI. Clinical characteristics of patients with colorectal cancer.

| Clinical characteristic | Case, n (%) |
|-------------------------|-------------|
| Age, years              |             |
| <60                     | 24          |
| ≥60                     | 59          |
| Sex                     |             |
| Male                    | 41          |
| Female                  | 42          |
| T stage                 |             |
| T1 and T2               | 48          |
| T3 and T4               | 35          |
| Lymph node metastasis   |             |
| Absent                  | 46          |
| Present                 | 37          |
| Differentiation         |             |
| Well                    | 28          |
| Moderate                | 27          |
| Poor                    | 28          |
| Tumor size              |             |
| <5 cm                   | 48          |
| ≥5 cm                   | 35          |
| Tumor location          |             |
| Colon                   | 22          |
| Rectum                  | 61          |
